# Supplementary material for: Sterically directed nitronate complexes of 2,6-di-tert-butyl-4-nitrophenoxide with Cu(ii) and Zn(ii) and their H-atom transfer reactivity
Source: Royal Society of Chemistry journal article supplement (doi:10.1039/c6dt04427a), 2017-01-01
Supplement: c6dt04427a1.pdf [file c6dt04427a1.pdf]

Supporting Information for:

# Sterically directed Nitronate Complexes of 2,6-Di- *tert*-Butyl-4-Nitrophenoxide with Cu(II) and Zn(II) and Their H-Atom Transfer Reactivity

Thomas R. Porter,<sup>a,b</sup> Ellen C. Hayes,<sup>a</sup> Werner Kaminsky,<sup>a</sup> and James M. Mayer<sup>a,c\*</sup>

<sup>a</sup>University of Washington, Department of Chemistry, Box 351700, Seattle, WA 98195, United States.

<sup>b</sup>Laboratoire d'Electrochimie Moléculaire, Université Paris Diderot, 15 Rue Jean-Antoine de Baïf, F-75205 Paris Cedex 13, France

<sup>c</sup>Department of Chemistry, Yale University, 225 Prospect St., New Haven, CT 06520, United States.

\*james.mayer@yale.edu

## Contents:

|                                                                                                                                                                                                                                                              |     |
|--------------------------------------------------------------------------------------------------------------------------------------------------------------------------------------------------------------------------------------------------------------|-----|
| 1. Crystallographic Data for <b>(1)</b> , <b>(2)</b> , <b>(3)</b> and <b>Tp<sup>tBu</sup>Cu<sup>II</sup>-OAc</b> .....                                                                                                                                       | S2  |
| 2. Optical Spectra of <b>(1)</b> and <b>(3)</b> .....                                                                                                                                                                                                        | S8  |
| 3. <sup>1</sup> H NMR Spectra of <b>(1)</b> and <b>(3)</b> .....                                                                                                                                                                                             | S10 |
| 4. Cyclic Voltammetry of <b>(1)</b> .....                                                                                                                                                                                                                    | S12 |
| 5. <sup>1</sup> H NMR of ½ [Tp <sup>tBu</sup> Cu <sup>I</sup> ] <sub>2</sub> + <sup>t</sup> Bu <sub>2</sub> NPArO• (No Reaction).....                                                                                                                        | S13 |
| 6. <sup>1</sup> H NMR of ½ [Tp <sup>tBu</sup> Cu <sup>I</sup> ] <sub>2</sub> + O <sub>2</sub> N <sup>t</sup> Bu <sub>2</sub> C <sub>6</sub> H <sub>2</sub> OH (No Reaction).....                                                                             | S14 |
| 7. Optical and <sup>1</sup> H NMR Data for the Completed Reaction Between ½ [Tp <sup>tBu</sup> Cu <sup>I</sup> ] <sub>2</sub> ,<br>O <sub>2</sub> N <sup>t</sup> Bu <sub>2</sub> C <sub>6</sub> H <sub>2</sub> OH and <sup>t</sup> Bu <sub>3</sub> ArO•..... | S15 |
| 8. <sup>1</sup> H NMR Data for the Completed Reaction Between <b>(1)</b> and TEMPOH.....                                                                                                                                                                     | S17 |

## 1. Crystallographic Data for (1), (2), (3) and $Tp^{tBu}Cu^{II}-OAc$

### 1.A. Crystallographic Data for (1)

#### General Procedure

A green prism, measuring  $0.18 \times 0.10 \times 0.05 \text{ mm}^3$  was mounted on a loop with oil. Data was collected at  $-173^\circ\text{C}$  on a Bruker APEX II single crystal X-ray diffractometer, Mo-radiation.

Crystal-to-detector distance was 40 mm and exposure time was 10 seconds per frame for all sets. The scan width was  $0.5^\circ$ . Data collection was 97.7% complete to  $25^\circ$  in  $\vartheta$ . A total of 51079 reflections were collected covering the indices,  $h = -15$  to 15,  $k = -13$  to 13,  $l = -22$  to 22. 9047 reflections were symmetry independent and the  $R_{\text{int}} = 0.0723$  indicated that the data was of average quality (0.07). Indexing and unit cell refinement indicated a primitive monoclinic lattice. The space group was found to be  $P 2_1$  (No. 4).

The data was integrated and scaled using SAINT, SADABS within the APEX2 software package by Bruker.

Solution by direct methods (SHELXS, SIR97) produced a complete heavy atom phasing model consistent with the proposed structure. The structure was completed by difference Fourier synthesis with SHELXL97. Scattering factors are from Waasmaier and Kirfel.<sup>1</sup> Hydrogen atoms were placed in geometrically idealised positions and constrained to ride on their parent atoms with C---H distances in the range 0.95-1.00 Angstrom. Isotropic thermal parameters  $U_{\text{eq}}$  were fixed such that they were  $1.2U_{\text{eq}}$  of their parent atom  $U_{\text{eq}}$  for CH's and  $1.5U_{\text{eq}}$  of their parent atom  $U_{\text{eq}}$  in case of methyl groups. All non-hydrogen atoms were refined anisotropically by full-matrix least-squares.

(1) Waasmaier, D.; Kirfel, A. *Acta. Cryst. A.* **1995**, 51, 416.

**Table S1:** Crystallographic data for **(1)** provided.

|                                   |                                             |                             |
|-----------------------------------|---------------------------------------------|-----------------------------|
| Empirical formula                 | $C_{35}H_{54}BCuN_7O_3$                     |                             |
| Formula weight                    | 695.20                                      |                             |
| Temperature                       | 100(2) K                                    |                             |
| Wavelength                        | 0.71073 Å                                   |                             |
| Crystal system                    | Monoclinic                                  |                             |
| Space group                       | P 2 <sub>1</sub>                            |                             |
| Unit cell dimensions              | a = 11.3921(4) Å                            | $\alpha = 90^\circ$ .       |
|                                   | b = 10.0553(4) Å                            | $\beta = 98.477(2)^\circ$ . |
|                                   | c = 16.8141(7) Å                            | $\gamma = 90^\circ$ .       |
| Volume                            | 1905.03(13) Å <sup>3</sup>                  |                             |
| Z                                 | 2                                           |                             |
| Density (calculated)              | 1.212 Mg/m <sup>3</sup>                     |                             |
| Absorption coefficient            | 0.615 mm <sup>-1</sup>                      |                             |
| F(000)                            | 742                                         |                             |
| Crystal size                      | 0.18 x 0.10 x 0.05 mm <sup>3</sup>          |                             |
| Theta range for data collection   | 2.33 to 28.34°.                             |                             |
| Index ranges                      | -15 ≤ h ≤ 15, -12 ≤ k ≤ 13, -22 ≤ l ≤ 22    |                             |
| Reflections collected             | 51079                                       |                             |
| Independent reflections           | 9047 [R <sub>int</sub> = 0.0723]            |                             |
| Completeness to theta = 25.00°    | 97.7 %                                      |                             |
| Max. and min. transmission        | 0.9699 and 0.8974                           |                             |
| Refinement method                 | Full-matrix least-squares on F <sup>2</sup> |                             |
| Data / restraints / parameters    | 9047 / 115 / 439                            |                             |
| Goodness-of-fit on F <sup>2</sup> | 1.080                                       |                             |
| Final R indices [I > 2σ(I)]       | R1 = 0.0738, wR2 = 0.1592                   |                             |
| R indices (all data)              | R1 = 0.0976, wR2 = 0.1712                   |                             |
| Absolute structure parameter      | 0.035(18)                                   |                             |
| Largest diff. peak and hole       | 1.731 and -1.010 e.Å <sup>-3</sup>          |                             |

## 1.B. Crystallographic Data For (2)

### General Procedure

A yellow prism, measuring 0.15 x 0.15 x 0.10 mm<sup>3</sup> was mounted on a loop with oil. Data was collected at -173°C on a Bruker APEX II single crystal X-ray diffractometer, Mo-radiation.

Crystal-to-detector distance was 40 mm and exposure time was 10 seconds per frame for all sets. The scan width was 0.5°. Data collection was 100% complete to 25° in  $\theta$ . A total of 140212 reflections were collected covering the indices,  $h = -18$  to 18,  $k = -19$  to 19,  $l = -26$  to 26. 9503 reflections were symmetry independent and the  $R_{int} = 0.0442$  indicated that the data was of better than average quality (0.07). Indexing and unit cell refinement indicated a primitive monoclinic lattice. The space group was found to be  $P 2_1/c$  (No. 14).

The data was integrated and scaled using SAINT, SADABS within the APEX2 software package by Bruker.

Solution by direct methods (SHELXS, SIR97) produced a complete heavy atom phasing model consistent with the proposed structure. The structure was completed by difference Fourier synthesis with SHELXL97. Scattering factors are from Waasmaier and Kirfel.<sup>1</sup> Hydrogen atoms were placed in geometrically idealised positions and constrained to ride on their parent atoms with C---H distances in the range 0.95-1.00 Angstrom. Isotropic thermal parameters  $U_{eq}$  were fixed such that they were  $1.2U_{eq}$  of their parent atom  $U_{eq}$  for CH's and  $1.5U_{eq}$  of their parent atom  $U_{eq}$  in case of methyl groups. All non-hydrogen atoms were refined anisotropically by full-matrix least-squares.

(1) Waasmaier, D.; Kirfel, A. *Acta. Cryst. A.* **1995**, 51, 416.

**Table S2:** Crystallographic data for (2) provided.

|                                   |                                                                   |                  |
|-----------------------------------|-------------------------------------------------------------------|------------------|
| Empirical formula                 | C <sub>35</sub> H <sub>54</sub> BN <sub>7</sub> O <sub>3</sub> Zn |                  |
| Formula weight                    | 697.03                                                            |                  |
| Temperature                       | 100(2) K                                                          |                  |
| Wavelength                        | 0.71073 Å                                                         |                  |
| Crystal system                    | Monoclinic                                                        |                  |
| Space group                       | P 2 <sub>1</sub> /c                                               |                  |
| Unit cell dimensions              | a = 13.5042(10) Å                                                 | α = 90°.         |
|                                   | b = 14.5848(12) Å                                                 | β = 103.397(4)°. |
|                                   | c = 19.8333(16) Å                                                 | γ = 90°.         |
| Volume                            | 3800.0(5) Å <sup>3</sup>                                          |                  |
| Z                                 | 4                                                                 |                  |
| Density (calculated)              | 1.218 Mg/m <sup>3</sup>                                           |                  |
| Absorption coefficient            | 0.688 mm <sup>-1</sup>                                            |                  |
| F(000)                            | 1488                                                              |                  |
| Crystal size                      | 0.15 x 0.15 x 0.10 mm <sup>3</sup>                                |                  |
| Theta range for data collection   | 2.09 to 28.47°.                                                   |                  |
| Index ranges                      | -18 ≤ h ≤ 18, -19 ≤ k ≤ 19, -26 ≤ l ≤ 26                          |                  |
| Reflections collected             | 140212                                                            |                  |
| Independent reflections           | 9503 [R <sub>int</sub> = 0.0442]                                  |                  |
| Completeness to theta = 25.00°    | 100.0 %                                                           |                  |
| Max. and min. transmission        | 0.9344 and 0.9038                                                 |                  |
| Refinement method                 | Full-matrix least-squares on F <sup>2</sup>                       |                  |
| Data / restraints / parameters    | 9503 / 0 / 439                                                    |                  |
| Goodness-of-fit on F <sup>2</sup> | 1.037                                                             |                  |
| Final R indices [I > 2σ(I)]       | R1 = 0.0274, wR2 = 0.0651                                         |                  |
| R indices (all data)              | R1 = 0.0369, wR2 = 0.0696                                         |                  |
| Largest diff. peak and hole       | 0.376 and -0.366 e.Å <sup>-3</sup>                                |                  |

### 1.C. Crystallographic Data For (3)

#### General Procedure

A dichroic brown/green needle, measuring 0.10 x 0.03 x 0.03 mm<sup>3</sup> was mounted on a loop with oil. Data was collected at -173°C on a Bruker APEX II single crystal X-ray diffractometer, Mo-radiation.

Crystal-to-detector distance was 40 mm and exposure time was 10 seconds per frame for all sets. The scan width was 0.5°. Data collection was 100% complete to 25° in  $\theta$ . A total of 41198 reflections were collected covering the indices,  $h = -26$  to 26,  $k = -10$  to 10,  $l = -24$  to 24. 7126 reflections were symmetry independent and the  $R_{int} = 0.0543$  indicated that the data was of good quality. Indexing and unit cell refinement indicated a C-centered monoclinic lattice. The space group was found to be C c (No. 9).

The data was integrated and scaled using SAINT, SADABS within the APEX2 software package by Bruker.

Solution by direct methods (SHELXS, SIR97) produced a complete heavy atom phasing model consistent with the proposed structure. The structure was completed by difference Fourier synthesis with SHELXL97. Scattering factors are from Waasmaier and Kirfel.<sup>1</sup> Hydrogen atoms were placed in geometrically idealised positions and constrained to ride on their parent atoms with C---H distances in the range 0.95-1.00 Angstrom. Isotropic thermal parameters  $U_{eq}$  were fixed such that they were 1.2 $U_{eq}$  of their parent atom  $U_{eq}$  for CH's and 1.5 $U_{eq}$  of their parent atom  $U_{eq}$  in case of methyl groups. All non-hydrogen atoms were refined anisotropically by full-matrix least-squares.

(1) Waasmaier, D.; Kirfel, A. *Acta. Cryst. A.* **1995**, 51, 416.

**Table S3:** Crystallographic data for **(3)** provided.

|                                      |                                                                    |                              |
|--------------------------------------|--------------------------------------------------------------------|------------------------------|
| Empirical formula                    | $C_{27}H_{38}BCuN_7O_3$                                            |                              |
| Formula weight                       | 582.99                                                             |                              |
| Temperature                          | 100(2) K                                                           |                              |
| Wavelength                           | 0.71073 Å                                                          |                              |
| Crystal system                       | Monoclinic                                                         |                              |
| Space group                          | C c                                                                |                              |
| Unit cell dimensions                 | $a = 19.8577(9)$ Å                                                 | $\alpha = 90^\circ$ .        |
|                                      | $b = 8.0385(3)$ Å                                                  | $\beta = 102.001(4)^\circ$ . |
|                                      | $c = 18.2723(9)$ Å                                                 | $\gamma = 90^\circ$ .        |
| Volume                               | $2853.0(2)$ Å <sup>3</sup>                                         |                              |
| Z                                    | 4                                                                  |                              |
| Density (calculated)                 | 1.357 Mg/m <sup>3</sup>                                            |                              |
| Absorption coefficient               | 0.807 mm <sup>-1</sup>                                             |                              |
| F(000)                               | 1228                                                               |                              |
| Crystal size                         | 0.10 x 0.03 x 0.03 mm <sup>3</sup>                                 |                              |
| Theta range for data collection      | 2.10 to 28.38°.                                                    |                              |
| Index ranges                         | $-26 \leq h \leq 26$ , $-10 \leq k \leq 10$ , $-24 \leq l \leq 24$ |                              |
| Reflections collected                | 41198                                                              |                              |
| Independent reflections              | 7126 [ $R_{int} = 0.0543$ ]                                        |                              |
| Completeness to theta = 25.00°       | 100.0 %                                                            |                              |
| Max. and min. transmission           | 0.9762 and 0.9237                                                  |                              |
| Refinement method                    | Full-matrix least-squares on $F^2$                                 |                              |
| Data / restraints / parameters       | 7126 / 2 / 361                                                     |                              |
| Goodness-of-fit on $F^2$             | 1.044                                                              |                              |
| Final R indices [ $I > 2\sigma(I)$ ] | $R1 = 0.0304$ , $wR2 = 0.0615$                                     |                              |
| R indices (all data)                 | $R1 = 0.0381$ , $wR2 = 0.0641$                                     |                              |
| Absolute structure parameter         | 0.010(7)                                                           |                              |
| Largest diff. peak and hole          | 0.272 and -0.346 e.Å <sup>-3</sup>                                 |                              |

1.D. Crystallographic data for  $Tp^{tBu}Cu^{II}-\kappa^2-OAc$ 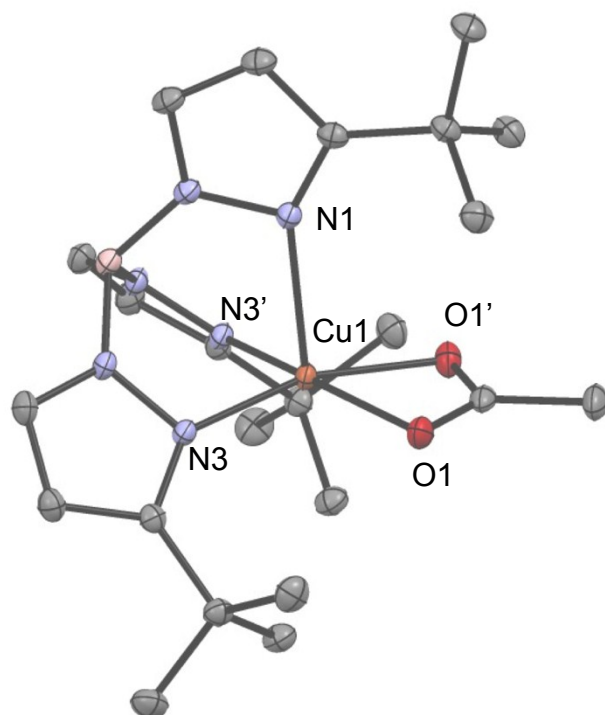

**Figure S1.** ORTEP of  $Tp^{tBu}Cu^{II}-\kappa^2-OAc$  with select atom labels showing 50% probability ellipsoids. Hydrogen atoms are omitted for clarity.

**Table S4.** Select bond lengths (Å) and angles (deg) of  $Tp^{tBu}Cu^{II}-\kappa^2-OAc$

| Primary Metal Coordination Sphere |            |            |            |
|-----------------------------------|------------|------------|------------|
| N1-Cu1                            | 2.3580(15) | N3'-Cu1    | 1.9957(10) |
| N1'-Cu1                           | 2.3580(15) | O1-Cu      | 2.0251(9)  |
| N3-Cu1                            | 1.9957(10) | O1'-Cu     | 2.0251(9)  |
|                                   |            |            |            |
| N1-Cu-N3                          | 92.75(4)   | N1-Cu1-O1' | 98.72(4)   |
| N2-Zn1-N6                         | 94.78(18)  | N3-Cu1-N3' | 91.94(6)   |
| N1-Cu-N3'                         | 92.75(4)   | O1-Cu-O1'  | 64.81(5)   |
| N1-Cu1-O1                         | 98.72(4)   |            |            |



### General Procedure

A green prism, measuring 0.29 x 0.25 x 0.10 mm<sup>3</sup> was mounted on a loop with oil. Data was collected at -173°C on a Bruker APEX II single crystal X-ray diffractometer, Mo-radiation.

Crystal-to-detector distance was 40 mm and exposure time was 10 seconds per frame for all sets. The scan width was 0.5°. Data collection was 100% complete to 25° in  $\theta$ . A total of 83201 reflections were collected covering the indices,  $h = -21$  to 21,  $k = -20$  to 20,  $l = -13$  to 13. 3313 reflections were symmetry independent and the  $R_{int} = 0.0407$  indicated that the data was good (average quality 0.07). Indexing and unit cell refinement indicated a primitive orthorhombic lattice. The space group was found to be  $Pnma$  (No.62).

The data was integrated and scaled using SAINT, SADABS within the APEX2 software package by Bruker.<sup>1</sup>

Solution by direct methods (SHELXS, SIR97) produced a complete heavy atom phasing model consistent with the proposed structure. The structure was completed by difference Fourier synthesis with SHELXL97. Scattering factors are from Waasmaier and Kirfel.<sup>1</sup> Hydrogen atoms were placed in geometrically idealised positions and constrained to ride on their parent atoms with C---H distances in the range 0.95-1.00 Angstrom. Isotropic thermal parameters  $U_{eq}$  were fixed such that they were 1.2 $U_{eq}$  of their parent atom  $U_{eq}$  for CH's and 1.5 $U_{eq}$  of their parent atom  $U_{eq}$  in case of methyl groups. All non-hydrogen atoms were refined anisotropically by full-matrix least-squares.

(1) Waasmaier, D.; Kirfel, A. *Acta. Cryst. A.* **1995**, 51, 416.

**Table S5:** Crystallographic data for Tp<sup>t</sup>BuCu<sup>II</sup>-OAc provided.

|                                   |                                                                  |              |
|-----------------------------------|------------------------------------------------------------------|--------------|
| Empirical formula                 | C <sub>23</sub> H <sub>37</sub> BCuN <sub>6</sub> O <sub>2</sub> |              |
| Formula weight                    | 503.94                                                           |              |
| Temperature                       | 100(2) K                                                         |              |
| Wavelength                        | 0.71073 Å                                                        |              |
| Crystal system                    | Orthorhombic                                                     |              |
| Space group                       | P n m a                                                          |              |
| Unit cell dimensions              | a = 15.964(3) Å                                                  | α = 90.000°. |
|                                   | b = 15.477(3) Å                                                  | β = 90.000°. |
|                                   | c = 10.284(2) Å                                                  | γ = 90.000°. |
| Volume                            | 2540.9(8) Å <sup>3</sup>                                         |              |
| Z                                 | 4                                                                |              |
| Density (calculated)              | 1.317 Mg/m <sup>3</sup>                                          |              |
| Absorption coefficient            | 0.891 mm <sup>-1</sup>                                           |              |
| F(000)                            | 1068                                                             |              |
| Crystal size                      | 0.29 x 0.25 x 0.10 mm <sup>3</sup>                               |              |
| Theta range for data collection   | 2.36 to 28.49°.                                                  |              |
| Index ranges                      | -21 ≤ h ≤ 21, -20 ≤ k ≤ 20, -13 ≤ l ≤ 13                         |              |
| Reflections collected             | 83201                                                            |              |
| Independent reflections           | 3313 [R(int) = 0.0407]                                           |              |
| Completeness to theta = 25.00°    | 100.0 %                                                          |              |
| Max. and min. transmission        | 0.9162 and 0.7823                                                |              |
| Refinement method                 | Full-matrix least-squares on F <sup>2</sup>                      |              |
| Data / restraints / parameters    | 3313 / 0 / 172                                                   |              |
| Goodness-of-fit on F <sup>2</sup> | 1.048                                                            |              |
| Final R indices [I > 2σ(I)]       | R1 = 0.0232, wR2 = 0.0649                                        |              |
| R indices (all data)              | R1 = 0.0248, wR2 = 0.0665                                        |              |
| Largest diff. peak and hole       | 0.400 and -0.413 e.Å <sup>-3</sup>                               |              |

## 2. Optical Spectra of (1) and (3)

### 2.A. Optical Spectrum of (1)

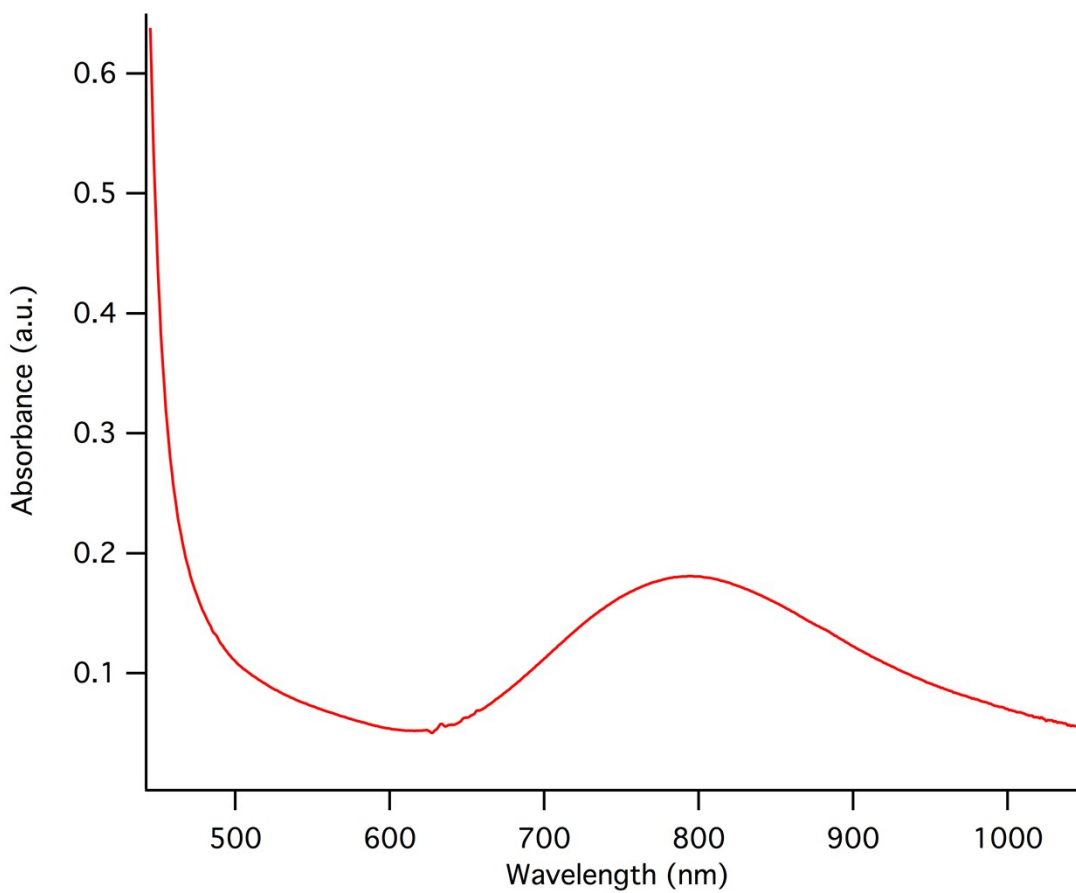

**Figure S2.** Optical spectrum of 1 mM (1) in benzene at room temperature.  $\lambda_{\max} = 796$  nm ( $180$   $M^{-1} \text{ cm}^{-1}$ )

**2.B. Optical Spectrum of (3)**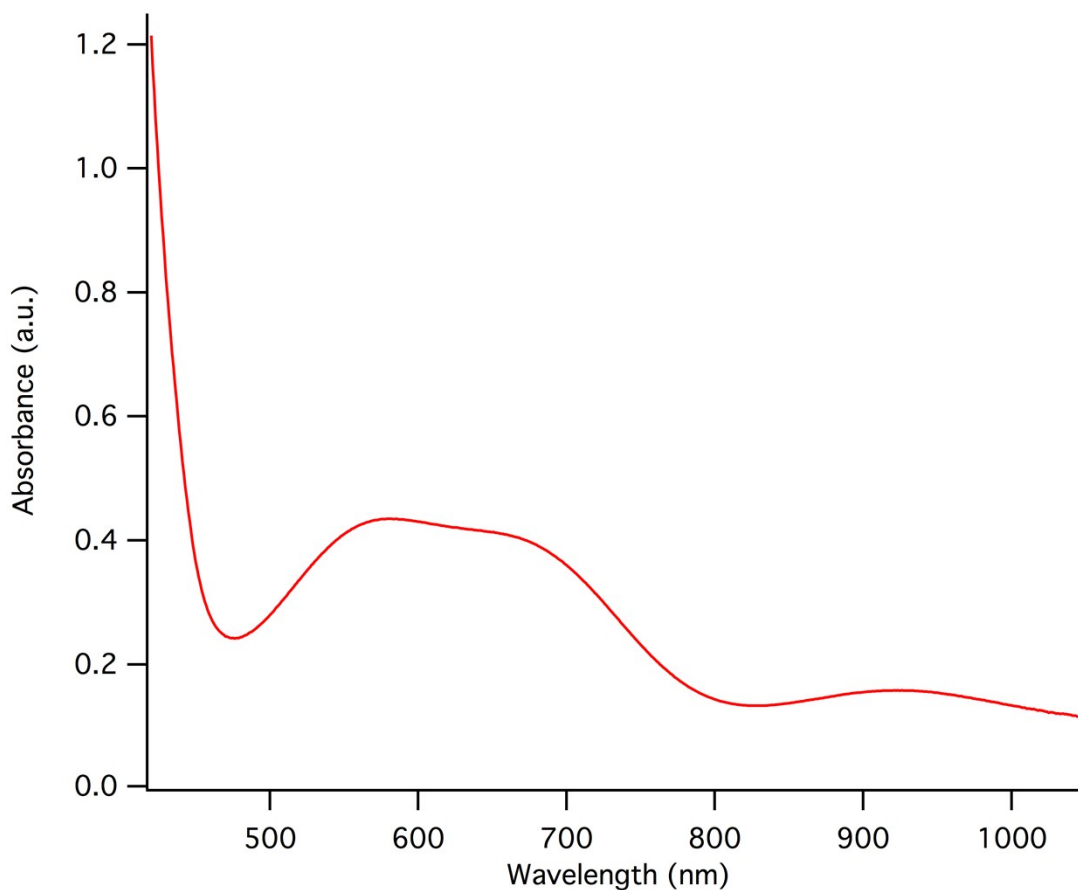

**Figure S3.** Optical spectrum of 1 mM (3) in benzene at room temperature.  $\lambda_{\max} = 583$  nm ( $430$   $M^{-1} \text{ cm}^{-1}$ ),  $\lambda_{\max} = 667$  nm ( $400$   $M^{-1} \text{ cm}^{-1}$ ),  $\lambda_{\max} = 830$  nm ( $130$   $M^{-1} \text{ cm}^{-1}$ ).

### 3. $^1H$ NMR Spectra of (1) and (3)

#### 3.A. $^1H$ NMR Spectrum of (1)

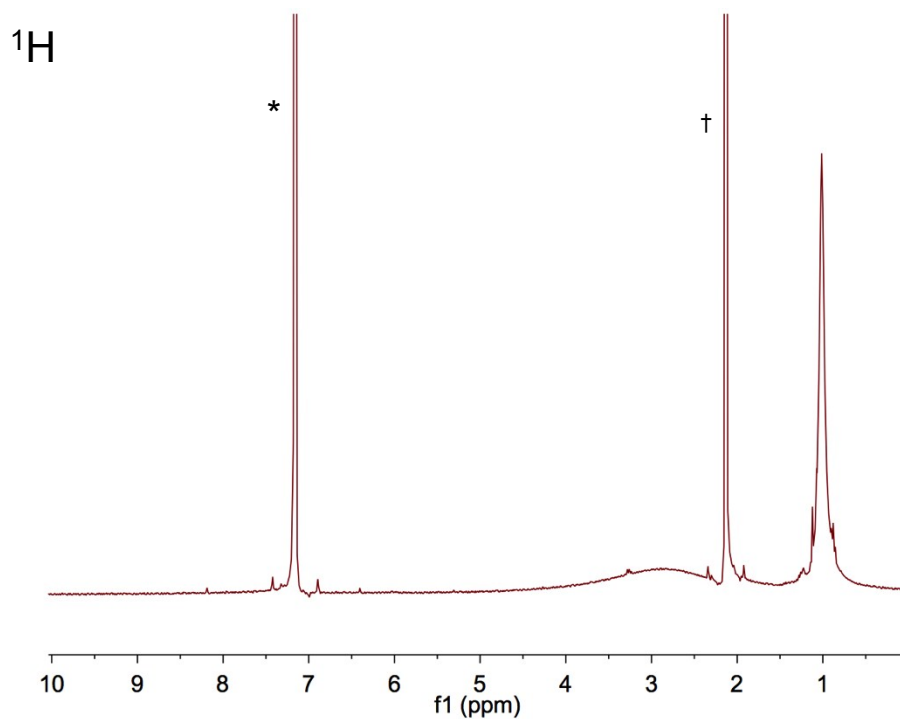

**Figure S4.**  $^1H$  NMR of (1) in benzene- $d_6$ . Signals for (1) are denoted with  $\dagger$ . Residual solvent signal and hexamethylbenzene internal standard are shown with \* and  $\dagger$ , respectively.

**3.B.  $^1H$  NMR Spectrum of (3)**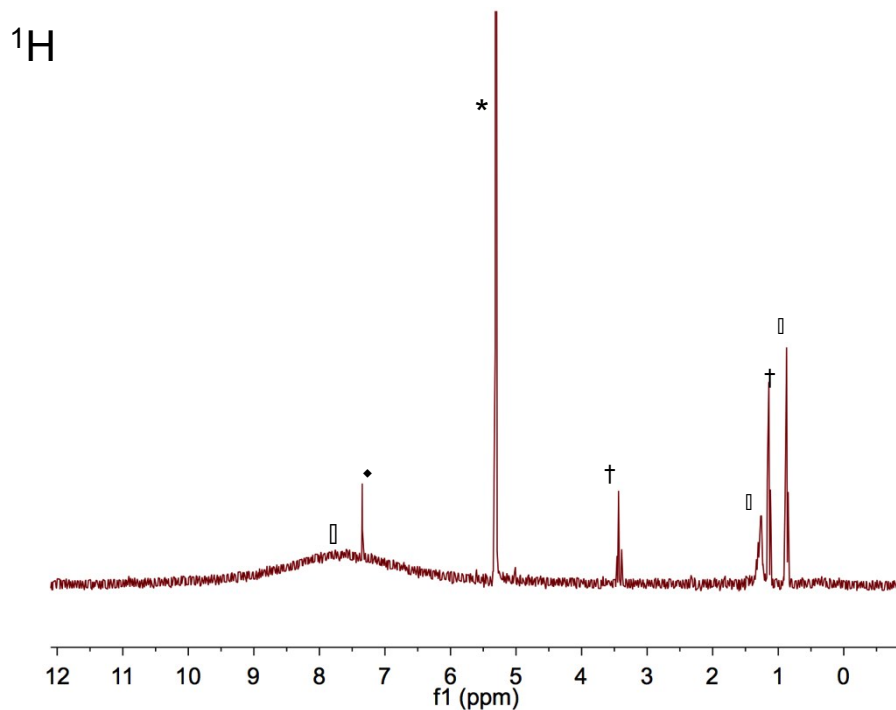

**Figure S5.**  $^1H$  NMR Spectrum of (3) in dichloromethane- $d_2$ . The broad feature of (3) is indicated by ✕. Residual solvent signal is shown by \*. Signals from solvents used in synthesis and crystallizations are shown by ♦ (benzene), † (ether) and ★ (pentane).

#### 4. Cyclic Voltammograms of (1) in Dichloromethane

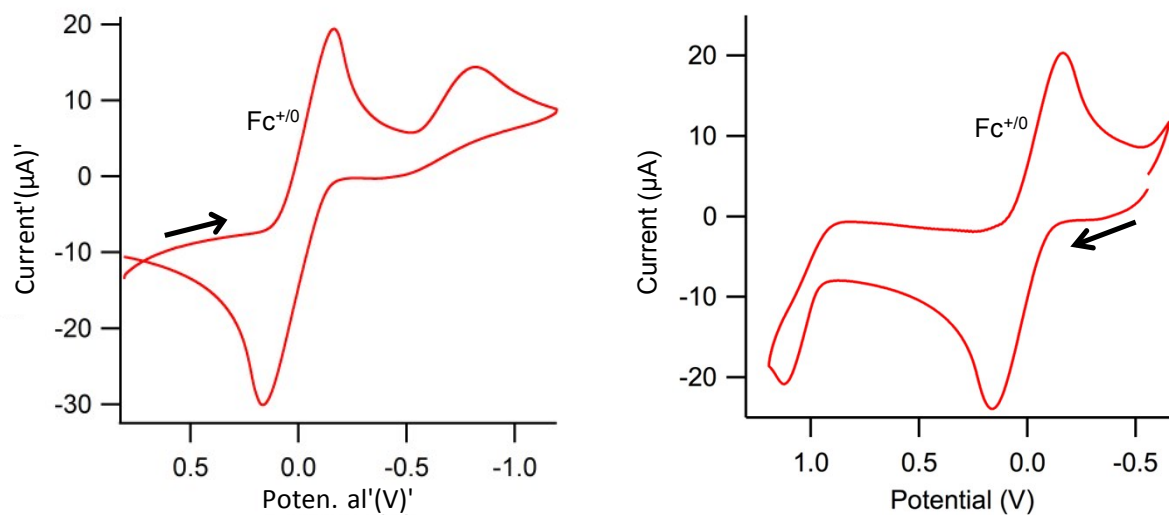

**Figure S6.** Cyclic Voltammograms of (1) (~1 mM) in dichloromethane with 0.1 mM  $[nBu_4N][PF_6]$  with scan rate of  $100\text{ mV s}^{-1}$ . Setup consisted of a 5 mm diameter glassy carbon working electrode and platinum auxiliary electrode. Potential is referenced to the ferrocene/ferrocenium internal standard.  $E_{c,p} = -0.84 \pm 0.05\text{ V}$ ;  $E_{a,p} = 1.10 \pm 0.05\text{ V}$ ; both vs.  $Fc^{+/0}$ .

**5.  $^1H$  NMR of  $\frac{1}{2} [Tp^{tBu}Cu^I]_2 + {}^tBu_2NParO^\bullet$  (No Reaction)**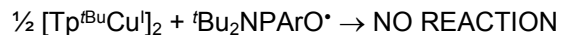

In a J. Young NMR tube, 14 mM  $[Tp^{tBu}Cu^I]_2$  in benzene- $d_6$  was combined with 28 mM  ${}^tBu_2NParO^\bullet$  (2,6-di-*tert*-butyl-4-(4'-nitrophenyl)phenoxy radical). After  $\sim 1$  hour the  $^1H$  NMR spectrum of the reaction solution was collected. Overlay with the  $^1H$  NMR spectrum of untreated  $[Tp^{tBu}Cu^I]_2$  shows no reaction occurs between  $\frac{1}{2} [Tp^{tBu}Cu^I]_2$  and  ${}^tBu_2NParO^\bullet$  under these conditions. It should be noted that the broad features arising from  $[Tp^{tBu}Cu^I]_2$  are due to fluxional processes as previously reported.<sup>2</sup>

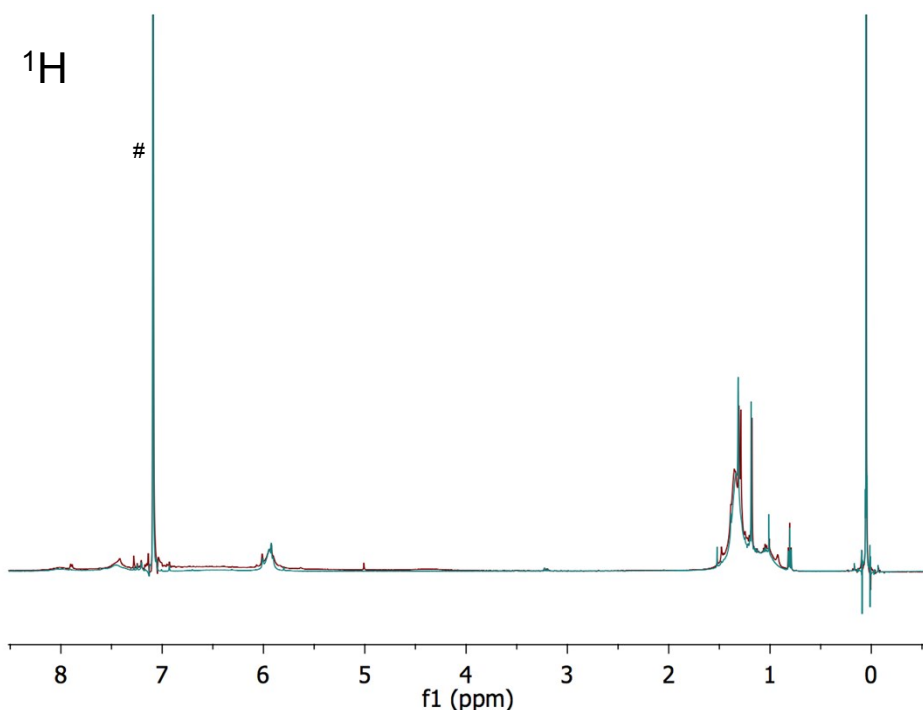

**Figure S7.**  $^1H$  NMR Spectrum of  $\frac{1}{2} [Tp^{tBu}Cu^I]_2$  and  ${}^tBu_2NParO^\bullet$  in benzene- $d_6$  (red) and  $^1H$  NMR spectrum of  $[Tp^{tBu}Cu^I]_2$  in benzene- $d_6$  (turquoise). Additional sharp peaks observed in the spectrum of the former are due to diamagnetic impurities in  ${}^tBu_2NParO^\bullet$  while the baseline discrepancy between  $\sim 8$  and  $5.5$  ppm is due to the broad signal associated with  ${}^tBu_2NParO^\bullet$ . Residual solvent signal is denoted with #.

(2) Carrier, S. M.; Ruggiero, C. E.; Houser, R. P.; Tolman, W. B. *Inorg. Chem.* **1993**, 32, 4889.



**6.  $^1H$  NMR of  $\frac{1}{2} [Tp^{tBu}Cu^I]_2 + O_2N^tBu_2C_6H_2OH$  (No Reaction)**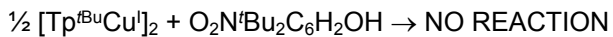

In a J. Young NMR tube, 2.5 mM  $[Tp^{tBu}Cu^I]_2$  in toluene- $d_8$  was combined with 5 mM  $O_2N^tBu_2C_6H_2OH$ . After  $\sim 1$  hour the  $^1H$  NMR spectrum of the reaction solution was collected. Overlay with the  $^1H$  NMR spectrum of untreated  $[Tp^{tBu}Cu^I]_2$  shows no reaction occurs between  $\frac{1}{2} [Tp^{tBu}Cu^I]_2$  and  $O_2N^tBu_2C_6H_2OH$  under these conditions.

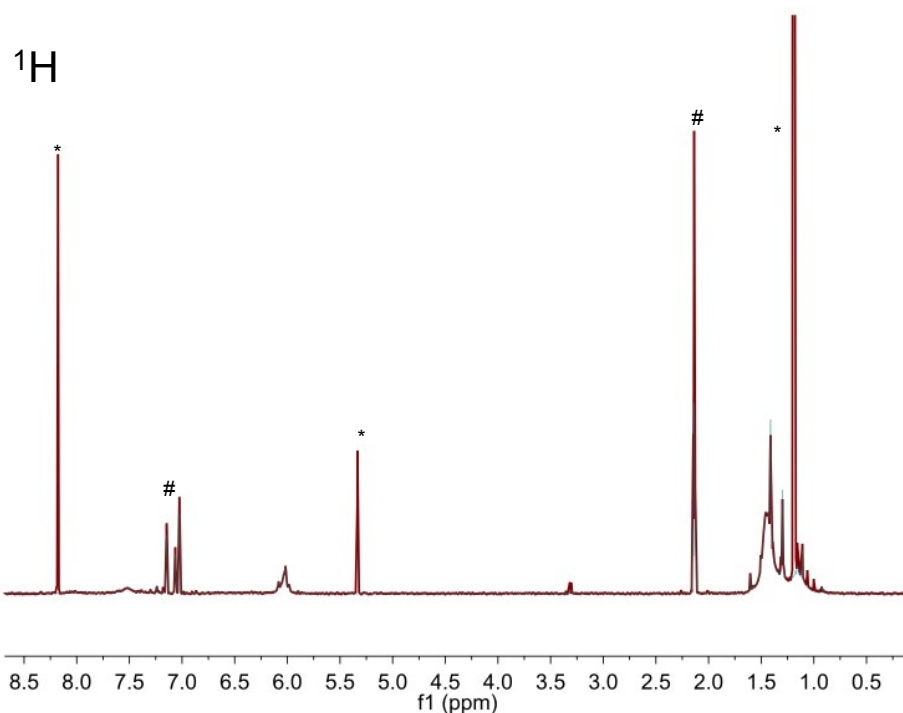

**Figure S8.**  $^1H$  NMR Spectrum of  $\frac{1}{2} [Tp^{tBu}Cu^I]_2$  and  $O_2N^tBu_2C_6H_2OH$  in toluene- $d_8$  (red) and  $^1H$  NMR spectrum of  $[Tp^{tBu}Cu^I]_2$  in toluene- $d_8$  (turquoise).  $O_2N^tBu_2C_6H_2OH$  is show with \* and the residual solvent peaks are denoted with #.

## 7. Optical and <sup>1</sup>H NMR Data for the Completed Reaction Between ½ [Tp<sup>t</sup>BuCu<sup>I</sup>]<sub>2</sub>, O<sub>2</sub>N<sup>t</sup>Bu<sub>2</sub>C<sub>6</sub>H<sub>2</sub>OH and <sup>t</sup>Bu<sub>3</sub>ArO<sup>•</sup>

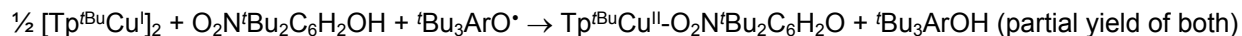

In a J. Young NMR tube, 6 mM [Tp<sup>t</sup>BuCu<sup>I</sup>]<sub>2</sub> in benzene-*d*<sub>6</sub> containing hexamethylbenzene as an internal standard was combined with 12 mM O<sub>2</sub>N<sup>t</sup>Bu<sub>2</sub>C<sub>6</sub>H<sub>2</sub>OH followed by 12 mM <sup>t</sup>Bu<sub>3</sub>ArO<sup>•</sup>. After ~ 3 hours the <sup>1</sup>H NMR spectrum showed the appearance of Tp<sup>t</sup>BuCu<sup>II</sup>O<sub>2</sub>N<sup>t</sup>Bu<sub>2</sub>C<sub>6</sub>H<sub>2</sub>O and <sup>t</sup>Bu<sub>3</sub>ArO–H in ~50 and 80% respectively. Approximately 40% of O<sub>2</sub>N<sup>t</sup>Bu<sub>2</sub>C<sub>6</sub>H<sub>2</sub>O–H remained at the end of the reaction.

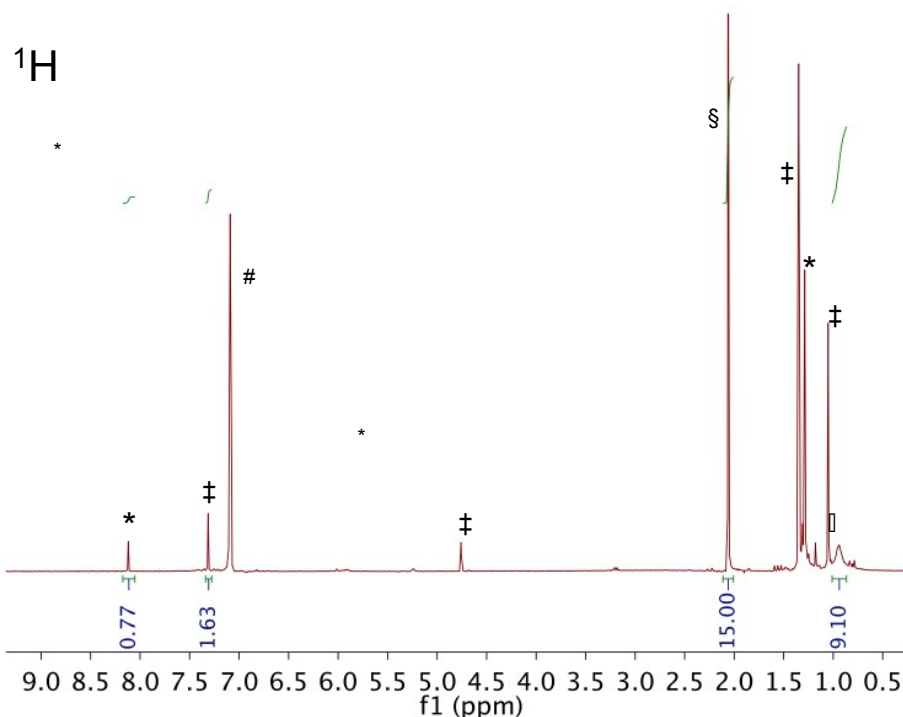

**Figure S9.** <sup>1</sup>H NMR Spectrum of the completed reaction between ½ [Tp<sup>t</sup>BuCu<sup>I</sup>]<sub>2</sub>, O<sub>2</sub>N<sup>t</sup>Bu<sub>2</sub>C<sub>6</sub>H<sub>2</sub>OH and <sup>t</sup>Bu<sub>3</sub>ArO<sup>•</sup> in benzene-*d*<sub>6</sub>. Tp<sup>t</sup>BuCu<sup>II</sup>-ON<sub>2</sub><sup>t</sup>Bu<sub>3</sub>C<sub>6</sub>H<sub>2</sub>O is shown with ★, <sup>t</sup>Bu<sub>3</sub>ArO–H is shown with ‡, and O<sub>2</sub>N<sup>t</sup>Bu<sub>2</sub>C<sub>6</sub>H<sub>2</sub>OH is shown with \*. The residual solvent peak and hexamethylbenzene are denoted by # and §, respectively.

To a 1 cm quartz cuvette containing  $[\text{Tp}^{\text{tBu}}\text{Cu}^{\text{I}}]_2$  and  $\text{O}_2\text{N}^{\text{tBu}}\text{C}_6\text{H}_2\text{OH}$  in benzene was added  $^{\text{tBu}}\text{Bu}_3\text{ArO}^{\bullet}$  through a gastight septum via a gastight syringe (final concentration of all species was 2.5 mM, 5 mM and 5 mM, respectively). The reaction reached completion after  $\sim 1$  hour as determined by UV/Vis spectroscopy (see main text Figure 2). Overlay of the spectrum of the completed reaction with a spectrum of independently prepared  $\text{Tp}^{\text{tBu}}\text{Cu}^{\text{II}}\text{-O}_2\text{N}^{\text{tBu}}\text{C}_6\text{H}_2\text{O}$  (normalized at 800 nm) shows  $\text{Tp}^{\text{tBu}}\text{Cu}^{\text{II}}\text{-O}_2\text{N}^{\text{tBu}}\text{C}_6\text{H}_2\text{O}$  was generated in roughly 60% yield.

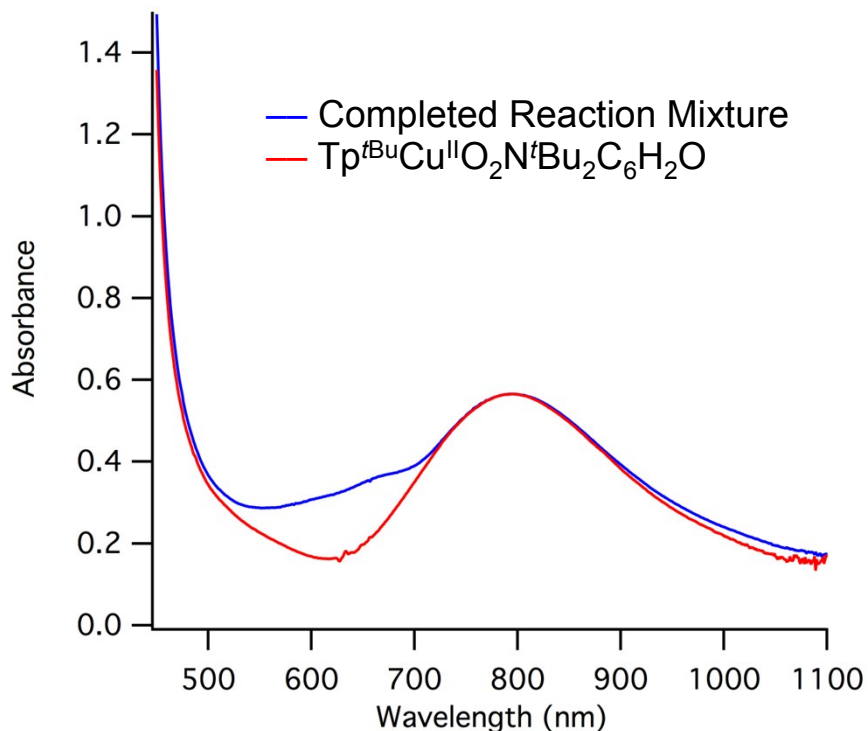

**Figure S10.** Optical spectrum of the completed reaction between 2.5 mM  $[\text{Tp}^{\text{tBu}}\text{Cu}^{\text{I}}]_2$ , 5 mM  $\text{O}_2\text{N}^{\text{tBu}}\text{C}_6\text{H}_2\text{O-H}$  and 5 mM  $^{\text{tBu}}\text{Bu}_3\text{ArO}^{\bullet}$  in benzene (blue). Overlay (red) shows the spectrum of independently prepared  $\text{Tp}^{\text{tBu}}\text{Cu}^{\text{II}}\text{-O}_2\text{N}^{\text{tBu}}\text{C}_6\text{H}_2\text{O}$  in benzene normalized to match the intensity of the peak observed in the reaction mixture at 800 nm.

### 8. $^1H$ NMR of $Tp^{tBu}Cu^{II}O_2N^tBu_2C_6H_2O + TEMPO-H$

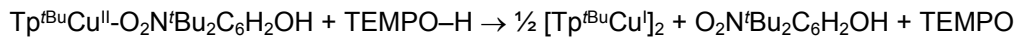

In a J. Young NMR tube, 12 mM  $Tp^{tBu}Cu^{II}-O_2N^tBu_2C_6H_2OH$  in benzene- $d_6$  was combined with 12 mM TEMPO-H. After  $\sim 1$  hour, the solution had changed colors from dark blue-green to light pink. The  $^1H$  NMR spectrum displayed signals for  $[Tp^{tBu}Cu^I]_2$  as well as  $O_2N^tBu_2C_6H_2O-H$ . Integration vs a hexamethylbenzene internal standard indicates the reactants were converted to products in quantitative yield.

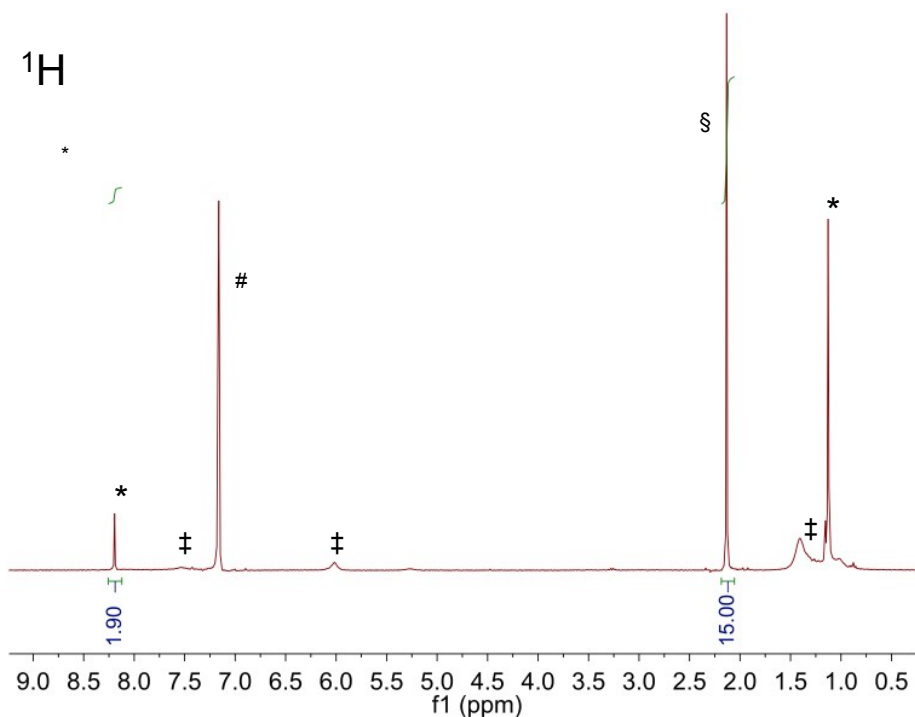

**Figure S11.**  $^1H$  NMR spectrum of the completed reaction between  $Tp^{tBu}Cu^{II}-ON_2^tBu_3C_6H_2O$  and TEMPO-H generating  $\frac{1}{2}[Tp^{tBu}Cu^I]_2$ ,  $O_2N^tBu_2C_6H_2O-H$  and TEMPO.  $[Tp^{tBu}Cu^I]_2$  is shown with ‡, and  $O_2N^tBu_2C_6H_2OH$  is shown with \*. The residual solvent peak and hexamethylbenzene are denoted by # and §, respectively.
